# Supplementary material for: Neurocognition and academic achievement among bereaved children in the Generation R Cohort
Source: PubMed Central journal article supplement — Sci Rep. 2024 Sep 11;14:21187. doi: 10.1038/s41598-024-72178-5 (PMC11391039; doi:10.1038/s41598-024-72178-5), 2024-09-11
Supplement: 41598_2024_72178_MOESM1_ESM.pdf [file 41598_2024_72178_MOESM1_ESM.pdf]

SUPPLEMENTARY MATERIAL

**Neurocognition and academic achievement among bereaved children in the Generation R Cohort**

Bolhuis, K<sup>t,1</sup>; Espinosa Dice, AL<sup>t,2</sup>; Jansen, P.W.<sup>1,3</sup>; Tiemeier, H<sup>1,2,4</sup>; Denckla, C.A.\*<sup>4</sup>

**Table S1 – Characteristics of bereaved individuals by age at when loss occurred**

| Variable                       |                                | Bereaved before IQ@5 assessment (N=359) | Bereaved after IQ@5 assessment (N=395) |
|--------------------------------|--------------------------------|-----------------------------------------|----------------------------------------|
| Child's sex                    | Female                         | 195 (54.3%)                             | 216 (54.7%)                            |
|                                | Male                           | 164 (45.7%)                             | 179 (45.3%)                            |
|                                | N missing                      | 0                                       | 0                                      |
| Mother's marital status        | Married or living with partner | 320 (93.3%)                             | 334 (90.5%)                            |
|                                | No partner                     | 23 (6.7%)                               | 35 (9.5%)                              |
|                                | N missing                      | 16                                      | 26                                     |
| Parental national origin       | Dutch                          | 243 (67.9%)                             | 264 (67.7%)                            |
|                                | Non-Dutch non-European         | 86 (24.0%)                              | 94 (24.1%)                             |
|                                | Non-Dutch European             | 29 (8.1%)                               | 32 (8.2%)                              |
|                                | N missing                      | 1                                       | 5                                      |
| Household income               | <1400                          | 34 (11.7%)                              | 45 (13.4%)                             |
|                                | 1400-2200                      | 52 (17.9%)                              | 61 (18.1%)                             |
|                                | >2200                          | 205 (70.4%)                             | 231 (68.5%)                            |
|                                | N missing                      | 68                                      | 58                                     |
| Mother's education             | Low                            | 11 (3.2%)                               | 14 (3.8%)                              |
|                                | Medium                         | 137 (39.8%)                             | 151 (41.0%)                            |
|                                | High                           | 196 (57.0%)                             | 203 (55.2%)                            |
|                                | N missing                      | 15                                      | 27                                     |
| Mother's psychopathology score | Mean (SD)                      | 0.2 (0.3)                               | 0.2 (0.3)                              |
|                                | Range                          | 0.0 - 2.1                               | 0.0 - 2.3                              |
|                                | N missing                      | 83                                      | 75                                     |

Note: Some individuals (n=42) had missing data on age at IQ@5 assessment, so we could not categorize the timing of their loss. As a result, the total number of bereaved individuals in this table (n=754) does not match the total number of bereaved individuals in Table 1 (n=796).

**Table S2 – Primary analysis sensitivity analyses: association between bereavement before age 10 and neurocognitive outcomes at ages 12-13, restricting to losses with at least some (>1) influence on child (N=1821, N bereaved = 482)**

| Outcome                        | Model      | Estimate | SE   | P value     |
|--------------------------------|------------|----------|------|-------------|
| CITO language percentile score | Unadjusted | -1.96    | 1.45 | 0.18        |
|                                | Adjusted   | -2.48    | 1.36 | 0.07        |
| CITO math percentile score     | Unadjusted | -2.47    | 1.45 | 0.09        |
|                                | Adjusted   | -2.65    | 1.38 | 0.06        |
| CITO test score                | Unadjusted | -0.70    | 0.48 | 0.14        |
|                                | Adjusted   | -0.83    | 0.45 | 0.06        |
| WISC CD T-score                | Unadjusted | -0.17    | 0.17 | 0.33        |
|                                | Adjusted   | -0.17    | 0.17 | 0.32        |
| WISC DS T-score                | Unadjusted | -0.24    | 0.14 | 0.09        |
|                                | Adjusted   | -0.24    | 0.14 | 0.08        |
| WISC MR T-score                | Unadjusted | -0.46    | 0.14 | <b>0.00</b> |
|                                | Adjusted   | -0.48    | 0.14 | <b>0.00</b> |
| WISC Vocab T-score             | Unadjusted | 0.11     | 0.15 | 0.48        |
|                                | Adjusted   | 0.08     | 0.15 | 0.57        |
| WISC Estimated FSIQ            | Unadjusted | -1.36    | 0.69 | 0.05        |
|                                | Adjusted   | -1.44    | 0.66 | <b>0.03</b> |
| Academic underachievement      | Unadjusted | -0.02    | 0.05 | 0.70        |
|                                | Adjusted   | -0.03    | 0.05 | 0.53        |

Note: CITO = primary school test; WISC = Weschler Intelligence Scale for Children; FSIQ = full scale intelligence quotient; CD = Coding; DS = Digit-span; MR = Matrix reasoning. Unadjusted models for CITO test score and academic underachievement include CITO test administration year and age at CITO assessment as covariates. Unadjusted models for CITO subscale percentile scores include age at CITO assessment as a covariate. All adjusted models include the following covariates, in addition to any CITO-specific covariates mentioned: child sex, parental national origin, maternal psychopathology, household income, maternal education, and maternal marital status.

**Table S3: Primary analysis sensitivity analyses: association between bereavement before age 10 and neurocognitive outcomes at ages 12-13, restricting to losses with no or a little ( $\leq 2$ ) influence on child (N=2039; N bereaved = 700)**

| <b>Outcome</b>                 | <b>Model</b> | <b>Estimate</b> | <b>SE</b> | <b>P value</b> |
|--------------------------------|--------------|-----------------|-----------|----------------|
| CITO language percentile score | Unadjusted   | -0.60           | 1.26      | 0.63           |
|                                | Adjusted     | -0.70           | 1.18      | 0.56           |
| CITO math percentile score     | Unadjusted   | -0.42           | 1.27      | 0.74           |
|                                | Adjusted     | -0.46           | 1.20      | 0.70           |
| CITO test score                | Unadjusted   | -0.17           | 0.42      | 0.68           |
|                                | Adjusted     | -0.21           | 0.39      | 0.58           |
| WISC CD T-score                | Unadjusted   | -0.15           | 0.15      | 0.33           |
|                                | Adjusted     | -0.18           | 0.15      | 0.23           |
| WISC DS T-score                | Unadjusted   | -0.16           | 0.12      | 0.20           |
|                                | Adjusted     | -0.15           | 0.12      | 0.21           |
| WISC MR T-score                | Unadjusted   | -0.21           | 0.12      | 0.08           |
|                                | Adjusted     | -0.21           | 0.12      | 0.08           |
| WISC Vocab T-score             | Unadjusted   | -0.06           | 0.13      | 0.63           |
|                                | Adjusted     | -0.06           | 0.13      | 0.63           |
| WISC Estimated FSIQ            | Unadjusted   | -1.02           | 0.59      | 0.09           |
|                                | Adjusted     | -1.06           | 0.57      | 0.06           |
| Academic underachievement      | Unadjusted   | 0.04            | 0.05      | 0.37           |
|                                | Adjusted     | 0.04            | 0.04      | 0.39           |

Note: CITO = primary school test; WISC = Weschler Intelligence Scale for Children; FSIQ = full scale intelligence quotient; CD = Coding; DS = Digit-span; MR = Matrix reasoning. Unadjusted models for CITO test score and academic underachievement include CITO test administration year and age at CITO assessment as covariates. Unadjusted models for CITO sub-scale percentile scores include age at CITO assessment as a covariate. All adjusted models include the following covariates, in addition to any CITO-specific covariates mentioned: child sex, parental national origin, maternal psychopathology, household income, maternal education, and maternal marital status.

**Table S4 – Primary analysis sensitivity analyses: association between bereavement before age 10 and neurocognitive outcomes at ages 12-13, restricting to losses with at least moderate (>2) influence on child (N=1435; N bereaved = 96)**

| Outcome                        | Model      | Estimate | SE   | P value     |
|--------------------------------|------------|----------|------|-------------|
| CITO language percentile score | Unadjusted | -4.71    | 2.87 | 0.10        |
|                                | Adjusted   | -4.45    | 2.72 | 0.10        |
| CITO math percentile score     | Unadjusted | -8.81    | 2.89 | <b>0.00</b> |
|                                | Adjusted   | -7.60    | 2.76 | <b>0.01</b> |
| CITO test score                | Unadjusted | -2.12    | 0.95 | <b>0.03</b> |
|                                | Adjusted   | -1.83    | 0.89 | <b>0.04</b> |
| WISC CD T-score                | Unadjusted | -0.08    | 0.35 | 0.82        |
|                                | Adjusted   | -0.05    | 0.34 | 0.89        |
| WISC DS T-score                | Unadjusted | -0.36    | 0.28 | 0.20        |
|                                | Adjusted   | -0.29    | 0.28 | 0.29        |
| WISC MR T-score                | Unadjusted | -0.70    | 0.28 | <b>0.01</b> |
|                                | Adjusted   | -0.68    | 0.27 | <b>0.01</b> |
| WISC Vocab T-score             | Unadjusted | 0.16     | 0.30 | 0.60        |
|                                | Adjusted   | 0.22     | 0.29 | 0.44        |
| WISC Estimated FSIQ            | Unadjusted | -1.69    | 1.36 | 0.21        |
|                                | Adjusted   | -1.37    | 1.31 | 0.30        |
| Academic underachievement      | Unadjusted | -0.21    | 0.11 | 0.05        |
|                                | Adjusted   | -0.18    | 0.10 | 0.07        |

Note: CITO = primary school test; WISC = Weschler Intelligence Scale for Children; FSIQ = full scale intelligence quotient; CD = Coding; DS = Digit-span; MR = Matrix reasoning.

Unadjusted models for CITO test score and academic underachievement include CITO test administration year and age at CITO assessment as covariates. Unadjusted models for CITO subscale percentile scores include age at CITO assessment as a covariate. All adjusted models include the following covariates, in addition to any CITO-specific covariates mentioned: child sex, parental national origin, maternal psychopathology, household income, maternal education, and maternal marital status.

**Table S5 – Primary analysis sensitivity analyses: association between bereavement before age 10 and Cito test score, restricting to Cito test scores in the middle 50<sup>th</sup> percentile and toggling the perceived influence of the loss on the child and restricting to Cito test scores (N=1175; 988)**

| <b>Influence Filter</b>                           | <b>Model</b> | <b>Estimate</b> | <b>SE</b> | <b>P value</b> |
|---------------------------------------------------|--------------|-----------------|-----------|----------------|
| No filter (1 no influence – 4 a lot of influence) | Unadjusted   | -0.16           | 0.24      | 0.49           |
|                                                   | Adjusted     | -0.18           | 0.24      | 0.46           |
| >1 (at least some influence)                      | Unadjusted   | -0.20           | 0.28      | 0.48           |
|                                                   | Adjusted     | -0.24           | 0.28      | 0.40           |

Note: CITO = primary school test. Unadjusted models for CITO test score include CITO test administration year and age at CITO assessment as covariates. Adjusted models also include the following covariates: child sex, parental national origin, maternal psychopathology, household income, maternal education, and maternal marital status.

**Table S6 – Secondary analysis sensitivity analyses: association between bereavement between ages 5 and 10 and neurocognitive outcomes at ages 12-13, restricting to losses with at least some (>1) influence on child (N=1598)**

| <b>Outcome</b>      | <b>Model</b>         | <b>Estimate</b> | <b>SE</b> | <b>P value</b> |
|---------------------|----------------------|-----------------|-----------|----------------|
| WISC MR T-score     | Adjusted + IQ        | -0.33           | 0.17      | 0.05           |
|                     | Adjusted + CBCL      | -0.35           | 0.18      | <b>0.04</b>    |
|                     | Adjusted + CBCL + IQ | -0.33           | 0.17      | 0.06           |
| WISC Estimated FSIQ | Adjusted + IQ        | -0.65           | 0.79      | 0.41           |
|                     | Adjusted + CBCL      | -0.83           | 0.84      | 0.32           |
|                     | Adjusted + CBCL + IQ | -0.64           | 0.78      | 0.42           |

Note: WISC = Weschler Intelligence Scale for Children; FSIQ = full scale intelligence quotient; MR = Matrix reasoning. Models include the following covariates: child sex, parental national origin, maternal psychopathology, household income, maternal education, and maternal marital status. As specified, they also include IQ and/or CBCL scores at age 5.

**Table S7: Secondary analysis sensitivity analyses: association between bereavement between ages 5 and 10 and neurocognitive outcomes at ages 12-13, restricting to losses with at least moderate (>2) influence on child (N=1396)**

| Outcome             | Model                | Estimate | SE   | P value     |
|---------------------|----------------------|----------|------|-------------|
| WISC MR T-score     | Adjusted + IQ        | -0.91    | 0.35 | <b>0.01</b> |
|                     | Adjusted + CBCL      | -0.96    | 0.35 | <b>0.01</b> |
|                     | Adjusted + CBCL + IQ | -0.90    | 0.35 | <b>0.01</b> |
| WISC Estimated FSIQ | Adjusted + IQ        | -1.25    | 1.58 | 0.43        |
|                     | Adjusted + CBCL      | -1.63    | 1.68 | 0.33        |
|                     | Adjusted + CBCL + IQ | -1.16    | 1.58 | 0.46        |

Note: WISC = Weschler Intelligence Scale for Children; FSIQ = full scale intelligence quotient; MR = Matrix reasoning. Models include the following covariates: child sex, parental national origin, maternal psychopathology, household income, maternal education, and maternal marital status. As specified, they also include IQ and/or CBCL scores at age 5.
